# Supplementary material for: Epigenetic activation of MGAT3 and corresponding bisecting GlcNAc shortens the survival of cancer patients
Source: PubMed Central journal article supplement (PMC5239506; doi:10.18632/oncotarget.10543), 2016-07-12
Supplement: oncotarget-07-51674-s001.pdf [file oncotarget-07-51674-s001.pdf]

## Epigenetic activation of *MGAT3* and corresponding bisecting GlcNAc shortens the survival of cancer patients

### Supplementary Materials

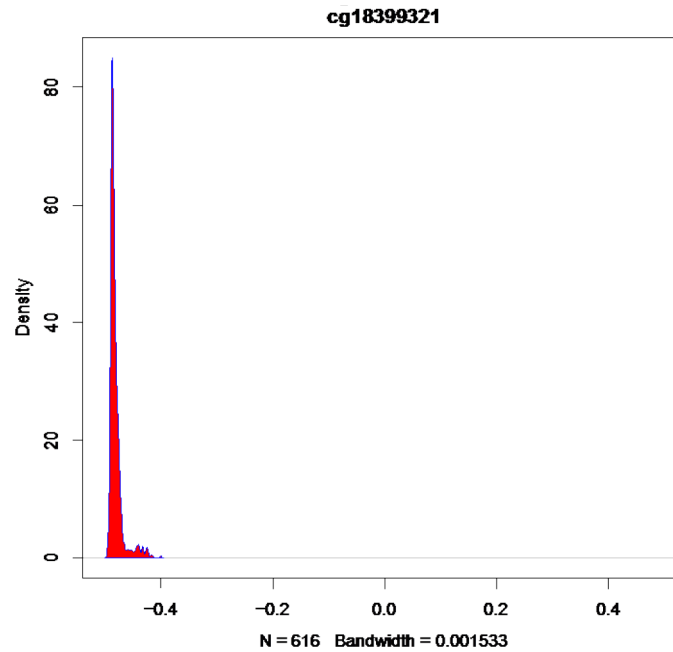

Supplementary Figure S1: Histogram displaying degree of methylation of TCGA serous ovarian cystadenocarcinoma at probe cg18399321 of the 27K Illumina human Methylation Array.

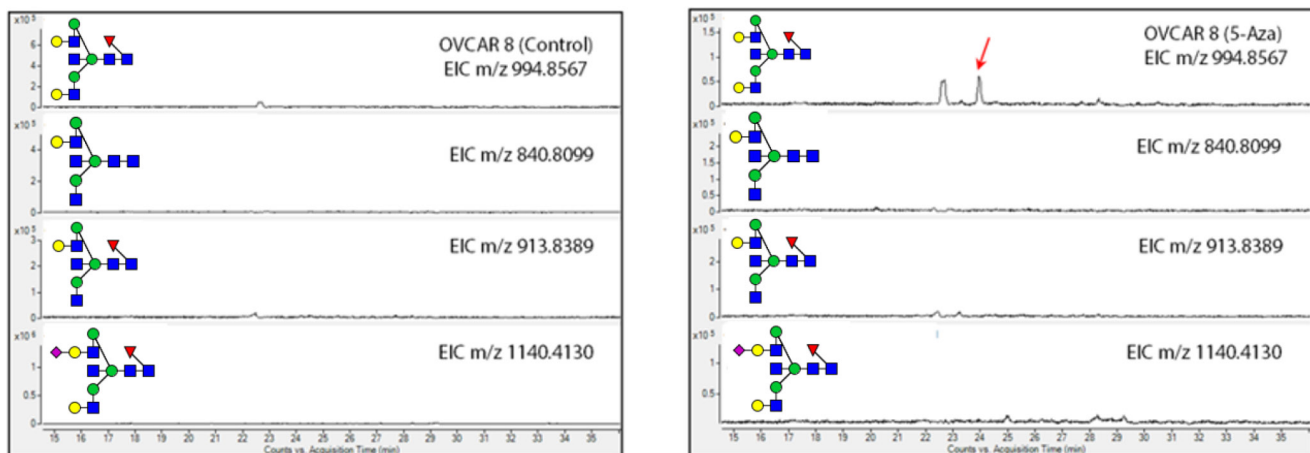

Supplementary Figure S2: Extracted Ion Chromatogram (EIC) of untreated OVCAR8 cells (left) and 5-Aza treated OVCAR8 cells (right).

**Supplementary Table S1: Precise genomic location on chromosome 22q13 hg38 of *MGAT3* CpG Islands are listed**

|                            | CpG Island # | Start    | End      | Length | CpGs     |
|----------------------------|--------------|----------|----------|--------|----------|
| <b>Genome Browser</b>      | 1            | 39456201 | 39457987 | 1787   | 195(224) |
|                            | 2            | 39487511 | 39489005 | 1495   | 141      |
| <b>CPG PLOT</b>            | 1            | 39456673 | 39458072 | 1400   | 204      |
|                            | 2            | 39487545 | 39487887 | 344    | 35       |
|                            | 3            | 39487911 | 39488415 | 505    | 55       |
|                            | 4            | 39488564 | 39488808 | 245    | 21       |
| <b>Methprimer</b>          | 1            | 39456165 | 39456318 | 154    | 11       |
|                            | 2            | 39456527 | 39456646 | 119    | 8        |
|                            | 3            | 39456673 | 39458072 | 1400   | 204      |
|                            | 4            | 39487545 | 39487887 | 344    | 35       |
|                            | 5            | 39487911 | 39488415 | 505    | 55       |
|                            | 6            | 39488438 | 39488543 | 107    | 7        |
|                            | 7            | 39488564 | 39488808 | 245    | 21       |
|                            | 8            | 39488816 | 39488984 | 169    | 14       |
| <b>CpG Island Searcher</b> | 1            | 39456418 | 39458412 | 1995   | 273      |
|                            | 2            | 39487384 | 39489238 | 1855   | 198      |

Default settings for CpG island query were GC content  $\geq 50\%$ , length  $\geq 200$  bp and ratio of observed to expected CGs  $\geq 0.6$  in the case of Genome Browser, Cpgplot and Methprimer. CpG island searcher used GC content  $\geq 55\%$  and ratio observed to expected GCs  $\geq 0.65$ .

**Supplementary Table S2: Correlating *MGAT3* expression and DNA methylation at two probes in close proximity to the transcription start site of *MGAT3***

*MGAT3* expression PAM50\_mRNA\_nature2012 ( $n = 514$ ); **Figure 6A**  
ANOVA  $p$ -value  $< 0.0001$

|                      | Basal-like ( $n = 98$ ) | HER2-enriched ( $n = 58$ ) | Luminal A ( $n = 231$ ) | Luminal B ( $n = 127$ ) |
|----------------------|-------------------------|----------------------------|-------------------------|-------------------------|
| Pairwise comparison  | <b>Basal-like</b>       | <b>HER2-enriched</b>       | <b>Luminal A</b>        |                         |
| <b>HER2-enriched</b> | $< 0.0001$              |                            |                         |                         |
| <b>Luminal A</b>     | $< 0.0001$              | 0.051                      |                         |                         |
| <b>Luminal B</b>     | $< 0.0001$              | 1.0                        | $< 0.0001$              |                         |

**DNA methylation ( $n = 208$ ); **Figure 6C and 6D****

|                                                 | Basal-like ( $n = 40$ ) | HER2-enriched ( $n = 14$ ) | Luminal A ( $n = 108$ ) | Luminal B ( $n = 46$ ) |
|-------------------------------------------------|-------------------------|----------------------------|-------------------------|------------------------|
| probe cg18399321 (ANOVA $p$ -value 0.0189)      |                         |                            |                         |                        |
| Pairwise comparison                             | <b>Basal-like</b>       | <b>HER2-enriched</b>       | <b>Luminal A</b>        |                        |
| <b>HER2-enriched</b>                            | 1                       |                            |                         |                        |
| <b>Luminal A</b>                                | 1                       | 1                          |                         |                        |
| <b>Luminal B</b>                                | 0.013                   | 0.880                      | 0.119                   |                        |
| probe cg03377355 (ANOVA $p$ -value $< 0.0001$ ) |                         |                            |                         |                        |
| Pairwise comparison                             | <b>Basal-like</b>       | <b>HER2-enriched</b>       | <b>Luminal A</b>        |                        |
| <b>HER2-enriched</b>                            | 0.0593                  |                            |                         |                        |
| <b>Luminal A</b>                                | 0.0593                  | 0.9113                     |                         |                        |
| <b>Luminal B</b>                                | 9.5E-06                 | 0.1973                     | 0.0201                  |                        |
